# Supplementary material for: Vascular miR-181b controls tissue factor-dependent thrombogenicity and inflammation in type 2 diabetes
Source: PubMed Central journal article supplement (PMC7027062; doi:10.1186/s12933-020-0993-z), 2020-02-17
Supplement: 12933_2020_993_MOESM2_ESM.pdf [file 12933_2020_993_MOESM2_ESM.pdf]

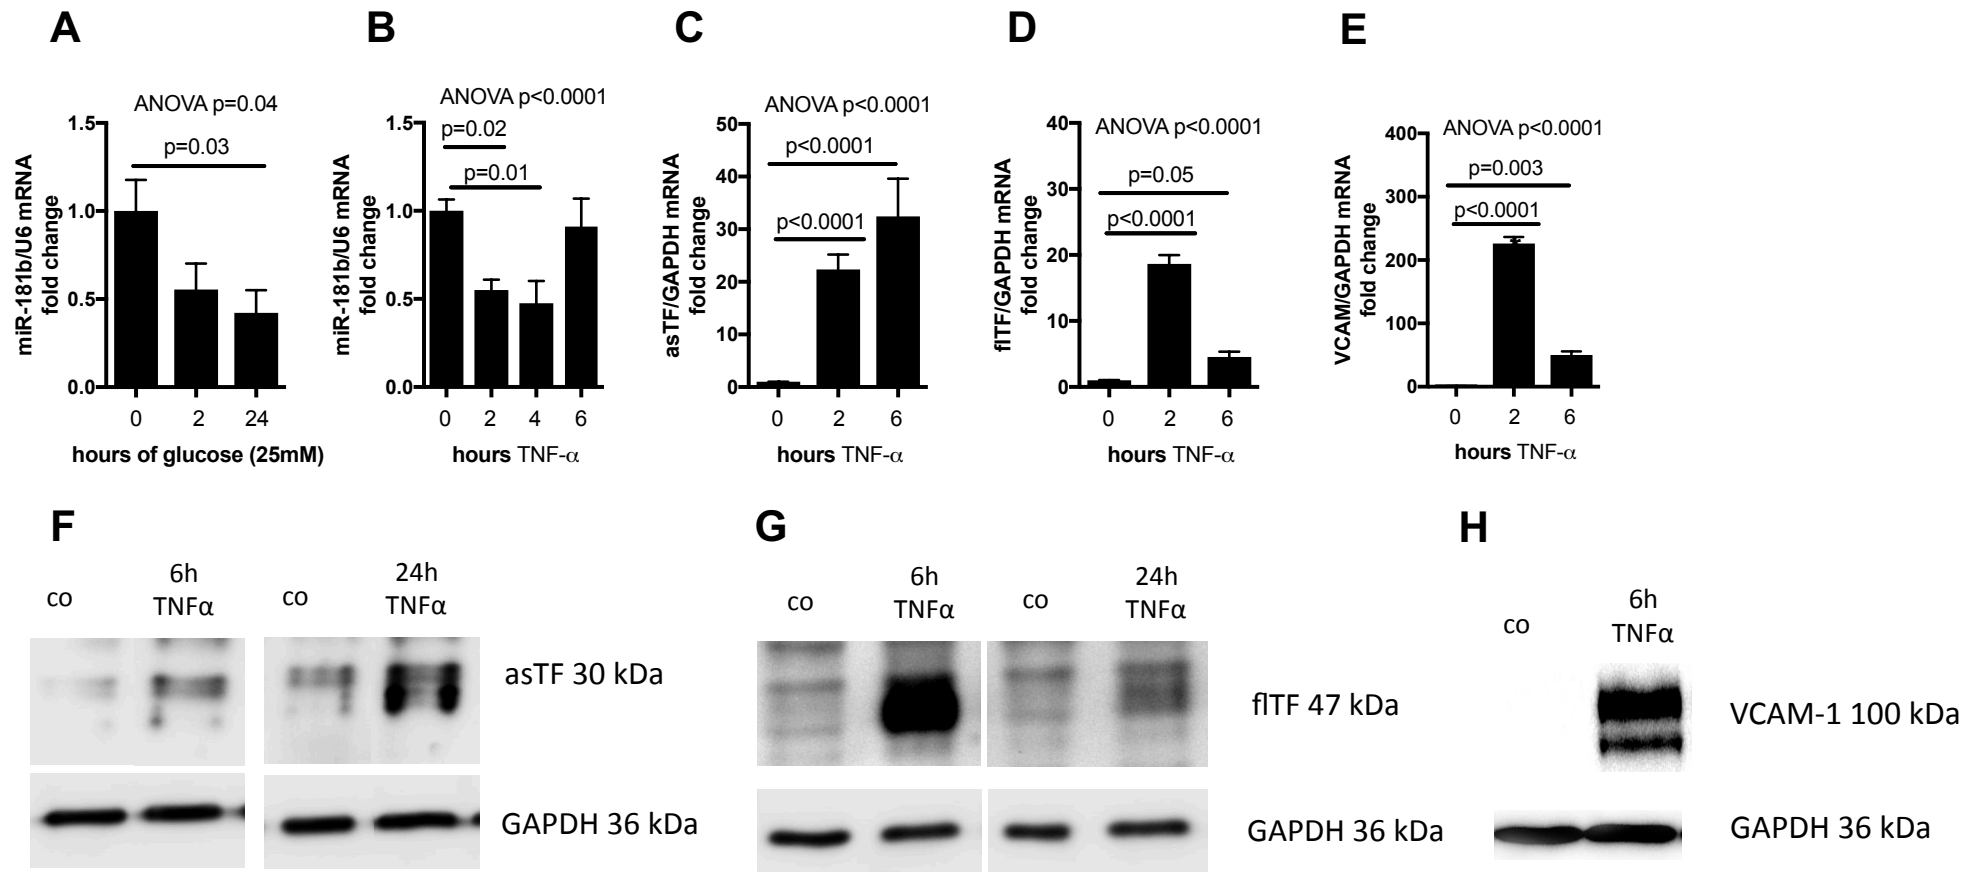

**Figure S1**
