# Supplementary material for: Vascular miR-181b controls tissue factor-dependent thrombogenicity and inflammation in type 2 diabetes
Source: Springer Nature journal article supplement (doi:10.1186/s12933-020-0993-z), 2020-02-17
Supplement: MOESM3 [file 17715826]

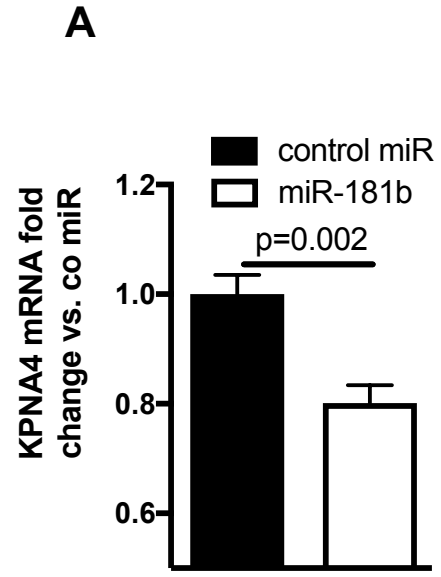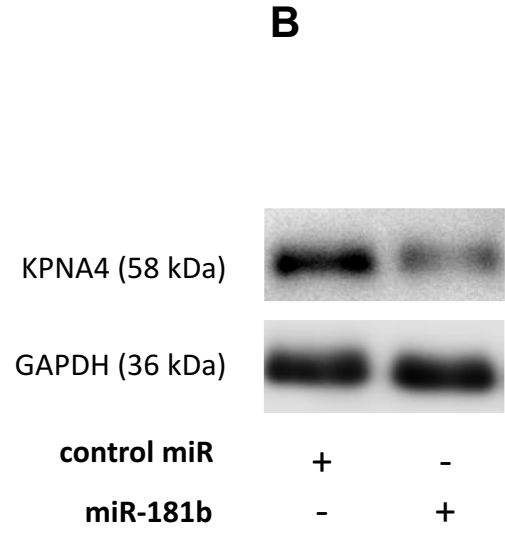

**Figure S2**
